# Supplementary material for: The Epidemiology of Neurological Complications in Adults With Sickle Cell Disease: A Retrospective Cohort Study
Source: PubMed Central journal article supplement (PMC8714798; doi:10.3389/fneur.2021.744118), 2021-12-15
Supplement: Table_1.pdf [file Table_1.pdf]

## *Supplementary Material*

### Supplementary Table

| Characteristics                    | Sickle cell sub-types |               |                                   | P-value          |
|------------------------------------|-----------------------|---------------|-----------------------------------|------------------|
|                                    | All<br>N=303          | HbSS<br>N=170 | HbSC & HbS/β-thalassemia<br>N=133 |                  |
| Autoimmune disease                 | 14 (4.6)              | 8 (2.6)       | 6 (1.9)                           | 0.93             |
| Sarcoidosis                        | 4 (1.3)               | 4 (1.3)       | 0                                 | 0.13             |
| Rheumatoid arthritis               | 4 (1.3)               | 2 (0.6)       | 2 (0.6)                           | 0.80             |
| Lupus                              | 4 (1.3)               | 2 (0.6)       | 2 (0.6)                           | 0.80             |
| Infections                         | 12 (3.9)              | 7 (2.3)       | 5 (1.6)                           | 0.87             |
| Other hematological comorbidities  | 12 (3.9)              | 1 (0.3)       | 11 (4)                            | <b>&lt;0.001</b> |
| Splenomegaly & thrombocytopenia    | 6 (1.9)               | 0             | 6 (1.9)                           | 0.87             |
| Gastroenterological comorbidities* | 11 (4)                | 3 (1)         | 8 (2.6)                           | <b>0.04</b>      |
| Osteoarthritis                     | 5 (1.6)               | 0             | 5 (1.6)                           | <b>0.01</b>      |
| Endocrinological comorbidities*    | 5 (1.6)               | 1 (0.3)       | 4 (1.3)                           | 0.10             |
| Deafness                           | 4 (1.3)               | 2 (0.6)       | 2 (0.6)                           | 0.80             |
| Cataracts                          | 3 (1)                 | 0             | 3 (1)                             | 0.08             |
| Glaucoma                           | 2 (0.6)               | 0             | 2 (0.6)                           | 0.19             |
| Vitreous haemorrhage               | 3 (1)                 | 0             | 3 (1)                             | 0.08             |
| Obstructive sleep apnoea           | 5 (1.6)               | 5 (1.6)       | 0                                 | 0.06             |

\* excluding gallstones. Percentages in the table are out of the whole group.
